## COMMENTS AND RESPONSES

### **Prognostic Value of the Insertion/Deletion Polymorphism of the ACE Gene in Type 2 Diabetic Subjects: Results From the Non-Insulin-Dependent Diabetes, Hypertension, Microalbuminuria or Proteinuria, Cardiovascular Events, and Ramipril (DIABHYCAR), Diabete de type 2, Nephropathie et Genetique (DIAB2NEPHROGENE), and Survie, Diabete de type 2 et Genetique (SURDIAGENE) Studies**

Response to Hadjadj et al.

**H**adjadj et al. (1) have recently reported on the potential prognostic value of the ACE insertion/deletion (ACE I/D) polymorphism in their study of Caucasians with type 2 diabetes. The ACE II genotype contributed to the development of end-stage renal failure (ESRF) in their main cohort analyses of patients from the Non-Insulin-Dependent Diabetes, Hypertension, Microalbuminuria or Proteinuria, Cardiovascular Events, and Ramipril (DIABHYCAR) study ( $P = 0.034$ ) (1). This finding was somewhat surprising because the II genotype, which has been linked to lower serum ACE levels, has previously been associated with protection against diabetic nephropathy (2,3). Particularly, a meta-analysis of 47

studies comprising 14,727 subjects found evidence for such a protective effect (2), a finding that has been reiterated in a more recent update of that meta-analysis (3).

Regarding the present unexpected finding by Hadjadj et al., it should be realized that their finding was based on only 18 cases that had developed ESRF during a 4-year follow-up of 3,126 patients (1). Critically, this finding failed to be confirmed in the replication studies on patients from the Survie, Diabete de type 2 et Genetique (SURDIAGENE) and Diabete de type 2, Nephropathie et Genetique (DIAB2NEPHROGENE) studies that had also been included in their report (1). In retrospect, this lack of replication probably highlighted a need for a larger number of incident cases in their main cohort analyses.

It is also worth noting that attention was not given to another emerging aspect of ACE genetic variation, i.e., haplotype diversity at this locus. Findings from recent reports have provided encouragement for an extensive haplotype analysis beyond the mere consideration of ACE I/D (4,5). This point was initially proposed in a study of Caucasians with type 2 diabetes from the Joslin Clinic in Boston (4): we found that although ACE I/D alone did not demonstrate any significant association with advanced diabetic nephropathy (as defined by the presence of proteinuria, chronic renal failure, or ESRF) due to the known minor effect of the II genotype (2,3), haplotype analysis of tagging single nucleotide polymorphisms in combination with ACE I/D revealed otherwise (4). Reassuringly, this evidence for a haplotype-disease association could be subsequently corroborated in a case-control study of type 1 diabetic Caucasians, albeit using a different set of single nucleotide polymorphisms for capturing haplotype diversity (5). In the context of the study by Hadjadj et al. (1), a current lack of enabling technology that allows accurate and convenient phasing of haplotypes in unrelated individuals would understandably have explained the absence of such data in their report. Such accurate haplotypic information for each individual patient would have been most useful in the survival analysis of cohorts. A comparison of the estimated haplotype frequencies between patients who progressed to ESRF and those who did not may also be meaningful.

DANIEL P.K. NG, PHD

From the Department of Community, Occupational and Family Medicine, National University of Singapore, Singapore.

Corresponding author: Daniel P.K. Ng, cofnpkd@nus.edu.sg.

DOI: 10.2337/dc08-1091

© 2008 by the American Diabetes Association.

Readers may use this article as long as the work is properly cited, the use is educational and not for profit, and the work is not altered. See <http://creativecommons.org/licenses/by-nc-nd/3.0/> for details.

#### References

1. Hadjadj S, Fumeron F, Roussel R, Saulnier PJ, Gallois Y, Ankotche A, Travert F, Khalil CA, Miot A, Alhenc-Gelas F, Lievre M, Marre M, the DIABHYCAR, DIAB2NEPHROGENE, and SURDIAGENE study groups: Prognostic value of the insertion/deletion polymorphism of the ACE gene in type 2 diabetic subjects: results from the Non-Insulin-Dependent Diabetes, Hypertension, Microalbuminuria or Proteinuria, Cardiovascular Events, and Ramipril (DIABHYCAR), Diabete de type 2, Nephropathie et Genetique (DIAB2NEPHROGENE), and Survie, Diabete de type 2 et Genetique (SURDIAGENE) studies. *Diabetes Care* 31:1847–1852, 2008
2. Ng DPK, Tai BC, Koh D, Tan KW, Chia KS: Angiotensin-I converting enzyme insertion/deletion polymorphism and its association with diabetic nephropathy: a meta-analysis of studies reported between 1994 and 2004 and comprising 14,727 subjects. *Diabetologia* 48:1008–1016, 2005
3. Ng DPK, Tai BC, Lim XL: Is the presence of retinopathy of practical value in defining cases of diabetic nephropathy in genetic association studies? The experience with the ACE insertion/deletion polymorphism based on 53 studies comprising 17,791 subjects. *Diabetes* 57:2541–2546, 2008
4. Ng DPK, Placha G, Choo S, Chia KS, Warram JH, Krolewski AS: A disease haplotype for advanced nephropathy in type 2 diabetes at the ACE locus. *Diabetes* 55:2660–2663, 2006
5. Hadjadj S, Tarnow L, Forsblom C, Kazeem G, Marre M, Groop PH, Parving HH, Cambien F, Tregouet DA, Gut IG, Th  va A, Gauguier D, Farrall M, Cox R, Matsuda F, Lathrop M, Hager-Vionnet N, the EURAGEDIC (European Rational Approach for Genetics of Diabetic Complications) Study Group: Association between angiotensin-converting enzyme gene polymorphisms and diabetic nephropathy: case-control, haplotype, and family-based study in three European populations. *J Am Soc Nephrol* 18:1284–1291, 2007
